# Supplementary material for: Extreme condition high temperature and high pressure studies of the K–U–Mo–O system
Source: Royal Society of Chemistry journal article supplement (doi:10.1039/d0dt03367g), 2020-01-01
Supplement: d0dt03367g1.pdf [file d0dt03367g1.pdf]

**Supplementary Information for**  
**Extreme Condition High Temperature and High Pressure Studies of the K-**  
**U-Mo-O System**

Gabriel L. Murphy,<sup>1\*</sup> Philip Kegler,<sup>1</sup> Martina Klinkenberg,<sup>1</sup> Shuao Wang,<sup>2</sup> and Evgeny V. Alekseev<sup>1\*</sup>

<sup>1</sup>*Institute of Energy and Climate Research, Forschungszentrum Jülich GmbH, 52428 Jülich, Germany*

<sup>2</sup>*State Key Laboratory of Radiation Medicine and Protection, School for Radiological and Interdisciplinary Sciences (RAD-X) and Collaborative Innovation Center of Radiation Medicine of Jiangsu Higher Education Institutions, Soochow University, Suzhou 215123, China*

Corresponding authors: Gabriel L. Murphy and Evgeny V. Alekseev

# 1. Scanning Electron Microscopy and Energy Dispersive X-ray Spectroscopy (SEM/EDS) Analysis

(a)  $K_2[UO_2(Mo_2O_7)_2]$

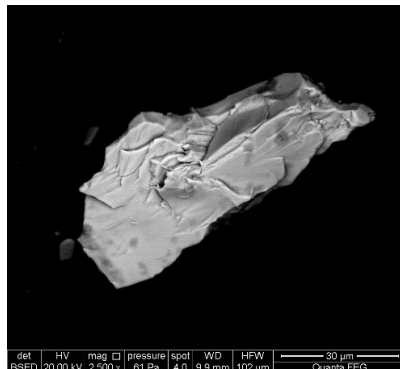

**Figure S1a.** SEM micrograph  $K_2[UO_2(Mo_2O_7)_2]$ .

**Table S1a.** Normalised (to U content) EDS result for  $K_2[UO_2(Mo_2O_7)_2]$ .

| Element | U    | K    | Mo   |
|---------|------|------|------|
| Total   | 1.00 | 2.08 | 4.52 |

(b)  $K_2[(UO_2)_2(Mo(VI)_4Mo(IV)(OH)_2)O_{16}]$

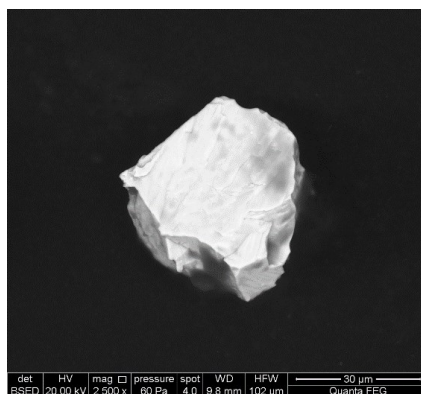

**Figure S1b.** SEM micrograph  $K_2[(UO_2)_2(Mo(VI)_4Mo(IV)(OH)_2)O_{16}]$ .

**Table S1b.** Normalised (to U content) EDS result for  $K_2[(UO_2)_2(Mo(VI)_4Mo(IV)(OH)_2)O_{16}]$ .

| Element | U    | K    | Mo   |
|---------|------|------|------|
| Total   | 1.00 | 1.39 | 1.93 |

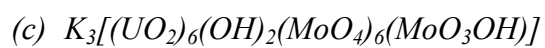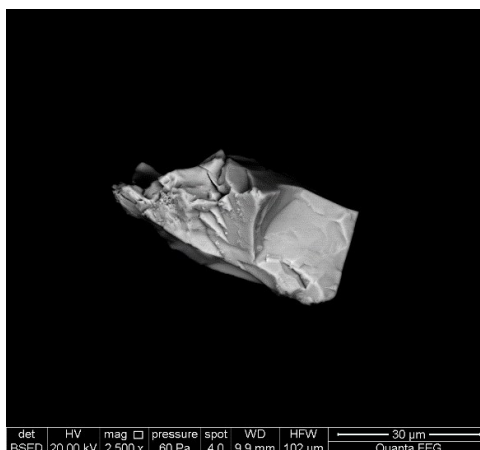

**Figure S1c.**

**Table S1c.** Normalised (to U content) EDS result for  $K_3[(UO_2)_6(OH)_2(MoO_4)_6(MoO_3OH)]$ .

| Element | U    | K    | Mo   |
|---------|------|------|------|
| Total   | 1.00 | 0.47 | 1.30 |

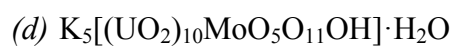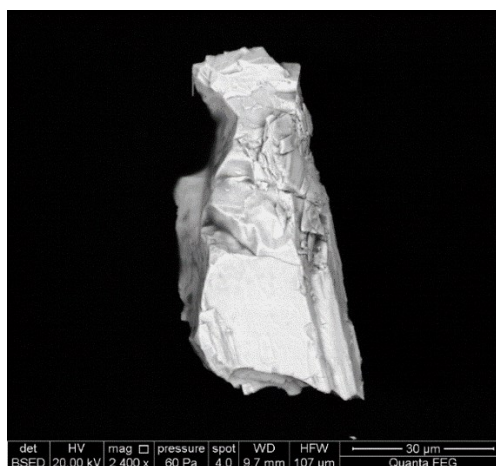

**Figure S1d.**

**Table S1d.** Normalised (to U content) EDS result for  $K_5[(UO_2)_{10}MoO_5O_{11}OH] \cdot H_2O$ .

| Element | U    | K    | Mo   |
|---------|------|------|------|
| Total   | 1.00 | 0.54 | 0.13 |

## 2. Bond Valence Sums (BVS) Calculations

BVS calculations were undertaken for the cations in all compounds in this investigation using the parameters reported by Burns and co-workers<sup>25</sup>. The parameters provided by Brese and O'Keeffe<sup>26</sup> were used for all other atoms.

**Table S2a.** BVS calculations for  $K_2[UO_2(Mo_2O_7)_2]$ .

|          | U                     | Mo(1)       | Mo(2)       | K           | $\Sigma$    |
|----------|-----------------------|-------------|-------------|-------------|-------------|
| O1       | 1.7069 <sup>x2↓</sup> |             |             | 0.26        | <b>1.97</b> |
| O2       | 0.63 <sup>x2↓</sup>   | 1.29        |             | 0.12        | <b>1.97</b> |
| O3       | 0.56 <sup>x2↓</sup>   | 0.70        | 0.81        |             | <b>2.07</b> |
| O4       |                       | 0.54        | 0.47 + 0.93 |             | <b>1.94</b> |
| O5       |                       | 1.45        | 0.36        | 0.15        | <b>1.96</b> |
| O6       |                       | 1.85        |             | 0.18        | <b>2.03</b> |
| O7       |                       | 0.22        | 1.56        | 0.1         | <b>1.88</b> |
| O8       |                       |             | 1.72        | 0.18        | <b>1.90</b> |
| $\Sigma$ | <b>5.80</b>           | <b>6.03</b> | <b>5.87</b> | <b>1.00</b> |             |

**Table S2b.** BVS calculations for  $K_2[(UO_2)_2(Mo(VI)_4Mo(IV)(OH)_2)O_{16}]$ .

|          | U                   | Mo(1)       | Mo(2)               | K           | $\Sigma$    |
|----------|---------------------|-------------|---------------------|-------------|-------------|
| O1       |                     | 1.67        | 0.49 <sup>x2↓</sup> | 0.32        | <b>2.48</b> |
| O2       | 0.54 <sup>x2↓</sup> | 1.27        |                     | 0.11        | <b>1.92</b> |
| O3       | 0.51 <sup>x2↓</sup> | 1.36        |                     | 0.08        | <b>1.95</b> |
| O4       | 2.02 <sup>x2↓</sup> |             |                     | 0.26        | <b>2.28</b> |
| O5       |                     | 1.35        | 0.26 <sup>x2↓</sup> | 0.19        | <b>1.81</b> |
| O6       |                     |             | 1.03 <sup>x2↓</sup> |             | <b>1.03</b> |
| $\Sigma$ | <b>6.14</b>         | <b>5.65</b> | <b>3.56</b>         | <b>0.96</b> |             |

**Table S2c.** BVS calculations for  $K_3[(UO_2)_6(OH)_2(MoO_4)_6(MoO_3OH)]$ .

|          | U(1)        | U(2)        | U(3)        | U(4)        | Mo(1)       | Mo(2)       | Mo(3)       | Mo(4)       | K(1)        | K(2)        | K(3)        | K(4)        | $\Sigma$    |
|----------|-------------|-------------|-------------|-------------|-------------|-------------|-------------|-------------|-------------|-------------|-------------|-------------|-------------|
| O1       | 0.49        |             |             |             |             | 1.40        |             |             | 0.11 x2↓    |             |             |             | <b>2.00</b> |
| O2       |             | 0.54        |             |             |             | 1.54        |             |             |             |             |             |             | <b>2.08</b> |
| O3       | 0.49        |             |             |             |             |             | 1.50        |             |             |             |             |             | <b>1.59</b> |
| O4       | 0.54        |             |             |             |             | 1.48        |             |             | 0.05 x2↓    |             |             |             | <b>2.07</b> |
| O5       | 0.54        |             |             |             |             |             |             | 1.54        |             |             |             |             | <b>2.08</b> |
| O6       | 1.77        |             |             |             |             |             |             |             | 0.20 x2↓    |             |             |             | <b>1.97</b> |
| O7       | 1.68        |             |             |             |             |             |             |             |             |             |             |             | <b>1.68</b> |
| O8       |             |             | 0.54x2↓     |             |             | 1.55        |             |             |             |             |             |             | <b>1.99</b> |
| O9       |             | 1.74        |             |             |             |             |             |             |             |             |             |             | <b>1.74</b> |
| O10      |             | 0.50        |             |             | 1.52 x2↓    |             |             |             |             |             |             |             | <b>2.02</b> |
| O11      |             | 0.56        |             |             |             |             |             | 1.47        |             |             |             |             | <b>2.03</b> |
| O12      |             | 0.51        |             |             |             |             |             | 1.50        |             |             |             |             | <b>2.01</b> |
| O13      | 0.60        |             |             |             | 1.52 x2↓    |             |             |             |             |             |             |             | <b>2.12</b> |
| O14      |             | 0.48        |             |             |             |             |             | 1.54        |             |             |             |             | <b>2.04</b> |
| O15      |             |             | 1.91        |             |             |             |             |             |             |             |             |             | <b>1.91</b> |
| O16      |             |             | 1.74        |             |             |             |             |             |             |             | 0.23        | 0.13        | <b>2.1</b>  |
| O17      |             |             | 0.53x2↓     |             |             |             |             | 1.45        |             | 0.19        |             | 0.11        | <b>2.28</b> |
| O18      |             | 1.71        |             |             |             |             |             |             |             |             | 0.24        |             | <b>1.95</b> |
| O19      |             |             |             | 1.72        |             |             |             |             |             | 0.06        |             |             | <b>1.78</b> |
| O20      |             |             |             | 1.81        |             |             |             |             |             | 0.21        | 0.24        | 0.12        | <b>2.28</b> |
| O21      |             |             | 0.36        |             |             |             |             |             |             | 0.08        | 0.13        | 0.11        | <b>0.68</b> |
| O22      |             |             |             | 0.58 x2↓    |             |             |             | 1.51        |             |             |             |             | <b>2.09</b> |
| O23      |             |             |             | 0.58 x2↓    |             |             |             | 1.55        |             |             |             |             | <b>2.13</b> |
| O24      |             |             |             | 0.35        |             |             |             |             |             | 0.23        | 0.16        | 0.13        | <b>0.87</b> |
| $\Sigma$ | <b>6.11</b> | <b>6.04</b> | <b>6.17</b> | <b>6.21</b> | <b>6.08</b> | <b>5.96</b> | <b>6.00</b> | <b>6.06</b> | <b>0.70</b> | <b>0.78</b> | <b>0.99</b> | <b>0.60</b> |             |

**Table S2d.** BVS calculations for  $K_5[(UO_2)_{10}MoO_5O_{11}OH] \cdot H_2O$ 

|          | U(1)        | U(2)        | U(3)        | U(4)        | U(5)        | U(6)        | U(7)        | U(8)        | U(9)        | U(10)       | Mo(1)       | K(1)        | K(2)        | K(3)        | K(4)        | K(5)        | K(6)        | K(7)        | $\Sigma$    |
|----------|-------------|-------------|-------------|-------------|-------------|-------------|-------------|-------------|-------------|-------------|-------------|-------------|-------------|-------------|-------------|-------------|-------------|-------------|-------------|
| O1       |             | 0.58        |             | 0.81        |             | 0.64        |             |             |             |             |             |             |             |             |             |             |             |             | <b>2.03</b> |
| O2       |             |             | 0.57        |             |             |             | 0.80        | 0.63        |             |             |             |             |             |             | 0.11        |             |             |             | <b>2.11</b> |
| O3       |             |             |             |             |             | 1.22        |             |             | 0.40        | 0.49        |             |             |             |             |             |             |             |             | <b>2.11</b> |
| O4       | 0.67        |             |             |             |             |             | 0.72        | 0.58        |             |             |             |             |             |             |             |             |             |             | <b>1.97</b> |
| O5       |             |             |             |             |             |             |             | 1.15        |             | 0.50        |             |             |             | 0.18        | 0.15        |             |             |             | <b>1.98</b> |
| O6       | 0.60        |             |             | 0.66        | 0.64        |             |             |             |             |             |             |             |             | 0.11        |             |             |             |             | <b>2.01</b> |
| O7       | 0.66        |             |             | 0.75        |             |             |             | 0.58        |             |             |             |             |             |             |             |             |             |             | <b>1.99</b> |
| O8       | 0.71        |             |             |             |             | 0.76        |             |             | 0.64        |             |             |             |             |             |             |             |             |             | <b>2.11</b> |
| O9       | 1.47        |             |             |             |             |             |             |             | 0.47        |             |             |             |             | 0.14        | 0.14        |             |             |             | <b>2.22</b> |
| O10      |             | 1.10        |             |             |             |             |             |             | 0.54        | 0.40        |             |             |             |             |             |             |             |             | <b>2.04</b> |
| O11      |             | 0.85        |             |             |             |             |             | 0.66        |             | 0.57        |             |             |             |             |             |             |             |             | <b>2.08</b> |
| O12      |             |             | 0.64        | 0.76        |             | 0.66        |             |             |             |             |             |             |             |             |             |             |             |             | <b>2.06</b> |
| O13      |             | 0.56        |             |             |             | 0.75        | 0.65        |             |             |             |             |             |             |             |             |             |             |             | <b>1.98</b> |
| O14      |             | 0.70        |             |             | 0.66        |             | 0.69        |             |             |             |             |             |             |             |             |             |             |             | <b>2.05</b> |
| O15      | 1.59        |             |             |             |             |             |             |             |             |             |             |             | 0.27        | 0.19        |             | 0.09        | 0.43        |             | <b>2.49</b> |
| O16      |             |             |             |             |             |             |             | 1.46        |             |             |             |             |             |             | 0.20        |             |             |             | <b>1.66</b> |
| O17      |             |             |             | 1.23        |             |             |             |             |             | 0.54        |             |             |             |             | 0.05        |             |             |             | <b>1.82</b> |
| O18      |             | 0.48        |             |             | 0.52        |             |             |             |             |             | 0.97        |             |             |             |             |             |             |             | <b>1.97</b> |
| O19      |             |             |             |             |             |             | 1.30        |             | 0.54        |             |             |             |             | 0.07        | 0.05        |             |             |             | <b>1.96</b> |
| O20      | 0.41        |             |             |             | 0.51        |             |             |             |             |             | 1.08        |             |             |             |             |             |             |             | <b>2.00</b> |
| O21      |             | 1.34        |             |             |             |             |             |             |             |             |             |             |             |             |             |             |             | 0.31        | <b>1.64</b> |
| O22      |             |             |             | 1.59        |             |             |             |             |             |             |             | 0.15        |             |             |             | 0.19        |             |             | <b>1.93</b> |
| O23      |             |             | 0.53        |             |             |             |             | 0.49        |             |             | 0.92        |             |             |             |             |             |             |             | <b>1.94</b> |
| O24      |             |             |             |             |             | 1.74        |             |             |             |             |             | 0.17        | 0.22        |             |             |             |             |             | <b>2.13</b> |
| O25      |             |             | 0.50        |             |             | 0.43        |             |             |             |             | 1.02        |             |             |             |             |             |             |             | <b>1.95</b> |
| O26      |             |             |             |             |             |             |             |             | 1.62        |             |             | 0.12        | 0.25        |             |             |             |             |             | <b>1.99</b> |
| O27      |             |             |             |             |             |             |             |             |             | 1.69        |             |             |             |             |             |             |             | 0.14        | <b>1.83</b> |
| O28      |             |             |             |             |             |             |             |             | 1.69        |             |             |             |             |             |             |             |             | 0.16        | <b>1.85</b> |
| O29      |             |             |             |             | 1.49        |             |             |             |             |             |             |             |             |             |             | 0.10        |             | 0.21        | <b>1.80</b> |
| O30      |             |             |             |             |             |             | 1.46        |             |             |             |             |             |             |             |             |             |             | 0.22        | <b>1.68</b> |
| O31      |             |             |             |             |             |             |             |             | 1.66        |             |             | 0.15        |             |             |             | 0.14        | 0.32        |             | <b>2.27</b> |
| O32      |             |             | 1.73        |             |             |             |             |             |             |             |             | 0.19        |             |             |             | 0.09        | 0.17        |             | <b>2.18</b> |
| O33      |             |             | 1.65        |             |             |             |             |             |             |             |             | 0.12        |             |             | 0.13        |             |             |             | <b>1.90</b> |
| O34      |             |             |             |             |             |             |             |             |             |             | 1.85        | 0.20        | 0.16        |             |             |             |             |             | <b>2.21</b> |
| O35      |             |             |             |             | 1.53        |             |             |             |             |             |             |             | 0.32        | 0.12        |             | 0.06        |             | 0.09        | <b>2.12</b> |
| O36      |             |             | 0.45        |             | 0.56        |             |             |             |             |             |             |             |             |             |             | 0.06        | 0.23        |             | <b>1.30</b> |
| OW1      |             |             |             |             |             |             |             |             |             |             |             |             | 0.18        |             |             |             |             | 0.12        | <b>0.30</b> |
| $\Sigma$ | <b>6.12</b> | <b>5.59</b> | <b>6.07</b> | <b>5.80</b> | <b>5.91</b> | <b>6.21</b> | <b>5.63</b> | <b>5.54</b> | <b>5.90</b> | <b>5.85</b> | <b>5.82</b> | <b>1.10</b> | <b>1.41</b> | <b>0.80</b> | <b>0.83</b> | <b>0.71</b> | <b>1.16</b> | <b>1.24</b> |             |

### 3. Selected Bond Lengths of Title Compounds

**Table S3a.**  $K_2[UO_2(Mo_2O_7)_2]$ .

|           |            |              |            |
|-----------|------------|--------------|------------|
| U-O(1) x2 | 1.773(6) Å | Mo(1)-O(2)   | 1.812(4) Å |
| U-O(2) x2 | 2.277(5) Å | Mo(1)-O(3)   | 2.056(5) Å |
| U-O(3) x2 | 2.337(4) Å | Mo(1)-O(4)   | 2.135(4) Å |
| K-O(1)i   | 2.752(5) Å | Mo(1)-O(5)   | 1.770(4) Å |
| K-O(1)ii  | 3.074(5) Å | Mo(1)-O(6)   | 1.679(5) Å |
| K-O(2)    | 2.913(5) Å | Mo(2)-O(3)   | 1.984(4) Å |
| K-O(5)    | 2.823(5) Å | Mo(2)-O(4)i  | 2.184(5) Å |
| K-O(6)    | 2.773(5) Å | Mo(2)-O(4)ii | 1.933(4) Å |
| K-O(7)    | 2.974(5) Å | Mo(2)-O(5)   | 2.283(5) Å |
| K-O(8)    | 2.763(5) Å | Mo(2)-O(7)   | 1.743(4) Å |
|           |            | Mo(2)-O(8)   | 1.704(6) Å |

**Table S3b.**  $K_2[(UO_2)_2(Mo(VI)_4Mo(IV)(OH)_2)O_{16}]$ .

|           |             |                 |              |
|-----------|-------------|-----------------|--------------|
| U-O(2) x2 | 2.277(10) Å | K-O(4)ii        | 2.808(12) Å  |
| U-O(3) x2 | 2.300(7) Å  | K-O(5)          | 2.743(9) Å   |
| U-O(4) x2 | 1.790(9) Å  | Mo(1)-O(1)      | 1.717(7) Å   |
| K-O(1)i   | 2.691(8) Å  | Mo(1)-O(2)      | 1.819(9) Å   |
| K-O(1)ii  | 3.089(10) Å | Mo(1)-O(3)i     | 2.032(8) Å   |
| K-O(2)    | 2.949(8) Å  | Mo(1)-O(3)ii    | 2.064(9) Å   |
| K-O(3)    | 3.088 (8) Å | Mo(1)-O(5)      | 1.796(9) Å   |
| K-O(4)i   | 3.090(10) Å | *Mo(2)-O(1) x 2 | 2.1565(10) Å |
| K-O(4)ii  | 2.997(9) Å  | *Mo(2)-O(1) x 2 | 1.869(2) Å   |

**Table S3c.**  $K_3[(UO_2)_6(OH)_2(MoO_4)_6(MoO_3OH)]$ .

|                |             |                 |             |
|----------------|-------------|-----------------|-------------|
| U(1)-O(1)      | 2.410(9) Å  | Mo(1)-O(10) x 2 | 1.746(10) Å |
| U(1)-O(3)      | 2.410(10) Å | Mo(1)-O(13) x 2 | 1.751(12) Å |
| U(1)-O(4)      | 2.359(9) Å  | Mo(2)-O(1)      | 1.781(10) Å |
| U(1)-O(5)      | 2.361(10) Å | Mo(2)-O(2)      | 1.750(10) Å |
| U(1)-O(6)      | 1.756(11) Å | Mo(2)-O(4)      | 1.764(9) Å  |
| U(1)-O(7)      | 1.782(11) Å | Mo(2)-O(8)      | 1.745(11) Å |
| U(1)-O(13)     | 2.306(11) Å | Mo(3)-O(3)      | 1.756(10) Å |
| U(2)-O(2)      | 2.356(10) Å | Mo(3)-O(14)     | 1.747(12) Å |
| U(2)-O(9)      | 1.759(11) Å | Mo(3)-O(17)     | 1.765(11) Å |
| U(2)-O(10)     | 2.407(9) Å  | Mo(3)-O(22)     | 1.753(12) Å |
| U(2)-O(11)     | 2.337(11) Å | Mo(4)-O(5)      | 1.746(10) Å |
| U(2)-O(12)     | 2.388(10) Å | Mo(4)-O(11)     | 1.765(11) Å |
| U(2)-O(14)     | 2.425(11) Å | Mo(4)-O(12)     | 1.753(10) Å |
| U(2)-O(18)     | 1.759(11) Å | Mo(4)-O(23)     | 1.746(11) Å |
| U(3)-O(8) x2   | 2.356(10) Å | K(1)-O(1) x 2   | 2.963(11) Å |
| U(3)-O(15)     | 1.708(16) Å | K(1)-O(4) x 2   | 3.243(10) Å |
| U(3)-O(16)     | 1.763(16) Å | K(1)-O(6) x 2   | 2.736(10) Å |
| U(3)-O(17) x2  | 2.369(10) Å | *K(2)-O(16)     | 2.74(3) Å   |
| U(3)-O(21)     | 2.566(14) Å | *K(2)-O(19)     | 3.18(3) Å   |
| U(4)-O(19)     | 1.774(16) Å | *K(2)-O(20)     | 2.70(3) Å   |
| U(4)-O(20)     | 1.744(17) Å | *K(2)-O(21)     | 3.08(3) Å   |
| U(4)-O(22) x 2 | 2.318(12) Å | *K(2)-O(24)     | 2.68(3) Å   |
| U(4)-O(23) x 2 | 2.317(11) Å | *K(3)-O(16)     | 2.94(3) Å   |
| U(4)-O(24)     | 2.582(15) Å | *K(3)-O(18)     | 2.91(3) Å   |
|                |             | *K(3)-O(20)     | 2.92(3) Å   |
|                |             | *K(3)-O(21)     | 3.06(3) Å   |
|                |             | *K(3)-O(24)     | 3.06(3) Å   |
|                |             | *K(4)-O(11)     | 3.20(3) Å   |
|                |             | *K(4)-O(12)     | 3.18(3) Å   |
|                |             | *K(4)-O(13)     | 3.20(3) Å   |
|                |             | *K(4)-O(18)     | 3.15(3) Å   |
|                |             | *K(4)-O(23)     | 3.13(3) Å   |



**Table S3d.**  $\text{K}_5[(\text{UO}_2)_{10}\text{MoO}_5\text{O}_{11}\text{OH}] \cdot \text{H}_2\text{O}$ 

|            |           |             |             |             |           |
|------------|-----------|-------------|-------------|-------------|-----------|
| U(1)-O(4)  | 2.28(3) Å | U(6)-O(13)  | 2.261(17) Å | K(1)-O(32)  | 2.75(4) Å |
| U(1)-O(6)  | 2.31(4) Å | U(6)-O(24)  | 1.79(4) Å   | K(1)-O(33)  | 2.80(3) Å |
| U(1)-O(7)  | 2.28(3) Å | U(6)-O(36)  | 2.46(4) Å   | K(1)-O(34)  | 2.69(4) Å |
| U(1)-O(8)  | 2.22(4) Å | U(7)-O(2)   | 2.20(3) Å   | *K(2)-OW1   | 2.72(3) Å |
| U(1)-O(9)  | 1.83(4) Å | U(7)-O(4)   | 2.19(4) Å   | *K(2)-O(15) | 2.64(6) Å |
| U(1)-O(15) | 1.82(6) Å | U(7)-O(13)  | 2.225(19) Å | *K(2)-O(24) | 2.65(4) Å |
| U(1)-O(20) | 2.49(3) Å | U(7)-O(14)  | 2.25(4) Å   | *K(2)-O(26) | 2.65(5) Å |
| U(2)-O(1)  | 2.27(3) Å | U(7)-O(19)  | 1.93(5) Å   | *K(2)-O(34) | 2.79(4) Å |
| U(2)-O(10) | 1.95(5) Å | U(7)-O(30)  | 1.88(4) Å   | *K(2)-O(35) | 2.54(4) Å |
| U(2)-O(11) | 2.15(4) Å | U(8)-O(2)   | 2.26(4) Å   | *K(3)-O(5)  | 2.85(4) Å |
| U(2)-O(13) | 2.31(3) Å | U(8)-O(4)   | 2.30(3) Å   | *K(3)-O(6)  | 3.01(4) Å |
| U(2)-O(14) | 2.21(3) Å | U(8)-O(7)   | 2.30(3) Å   | *K(3)-O(9)  | 2.84(4) Å |
| U(2)-O(18) | 2.43(3) Å | U(8)-O(11)  | 2.26(4) Å   | *K(3)-O(15) | 2.69(5) Å |
| U(2)-O(21) | 1.87(3) Å | U(8)-O(16)  | 1.84(4) Å   | *K(3)-O(19) | 3.05(6) Å |
| U(3)-O(2)  | 2.32(3) Å | U(8)-O(23)  | 2.42(3) Å   | *K(3)-O(35) | 2.91(4) Å |
| U(3)-O(12) | 2.24(4) Å | U(9)-O(3)   | 2.50(3) Å   | K(4)-O(2)   | 2.93(4) Å |
| U(3)-O(23) | 2.35(4) Å | U(9)-O(8)   | 2.34(4) Å   | K(4)-O(5)   | 2.84(4) Å |
| U(3)-O(25) | 2.43(4) Å | U(9)-O(9)   | 2.44(4) Å   | K(4)-O(9)   | 2.84(4) Å |
| U(3)-O(32) | 1.71(4) Å | U(9)-O(10)  | 2.37(4) Å   | K(4)-O(16)  | 2.75(4) Å |
| U(3)-O(33) | 1.80(4) Å | U(9)-O(19)  | 2.34(5) Å   | K(4)-O(19)  | 3.18(4) Å |
| U(3)-O(36) | 2.48(4) Å | U(9)-O(26)  | 1.74(4) Å   | K(4)-O(33)  | 2.89(4) Å |
| U(4)-O(1)  | 2.20(3) Å | U(9)-O(28)  | 1.79(3) Å   | *K(5)-O(15) | 3.04(6) Å |
| U(4)-O(6)  | 2.23(3) Å | U(10)-O(3)  | 2.39(3) Å   | *K(5)-O(22) | 2.79(5) Å |
| U(4)-O(7)  | 2.20(4) Å | U(10)-O(5)  | 2.40(4) Å   | *K(5)-O(29) | 2.99(3) Å |
| U(4)-O(12) | 2.17(4) Å | U(10)-O(10) | 2.52(4) Å   | *K(5)-O(30) | 3.19(4) Å |
| U(4)-O(17) | 1.91(5) Å | U(10)-O(11) | 2.28(4) Å   | *K(5)-O(31) | 2.87(3) Å |
| U(4)-O(22) | 1.77(5) Å | U(10)-O(17) | 2.38(5) Å   | *K(5)-O(32) | 2.99(4) Å |
| U(5)-O(6)  | 2.28(3) Å | U(10)-O(27) | 1.81(4) Å   | *K(5)-O(35) | 3.14(4) Å |
| U(5)-O(14) | 2.28(3) Å | U(10)-O(31) | 1.75(3) Å   | *K(6)-O(22) | 2.72(5) Å |
| U(5)-O(18) | 2.35(2) Å | Mo(1)-O(18) | 1.94(3) Å   | *K(6)-O(29) | 2.44(5) Å |
| U(5)-O(20) | 2.40(4) Å | Mo(1)-O(20) | 1.86(3) Å   | *K(6)-O(30) | 2.51(5) Å |
| U(5)-O(29) | 1.89(4) Å | Mo(1)-O(23) | 1.95(3) Å   | *K(6)-O(32) | 2.78(5) Å |
| U(5)-O(35) | 1.82(4) Å | Mo(1)-O(25) | 1.89(4) Å   | K(7)-OW1    | 2.95(5) Å |
| U(5)-O(36) | 2.31(4) Å | Mo(1)-O(34) | 1.67(4) Å   | K(7)-O(21)  | 2.53(3) Å |
| U(6)-O(1)  | 2.28(4) Å | K(1)-O(22)  | 2.83(5) Å   | K(7)-O(27)  | 2.67(4) Å |
| U(6)-O(3)  | 1.98(3) Å | K(1)-O(24)  | 2.86(4) Å   | K(7)-O(28)  | 2.70(4) Å |
| U(6)-O(8)  | 2.15(4) Å | K(1)-O(26)  | 3.10(3) Å   | K(67)-O(29) | 2.71(4) Å |
| U(6)-O(12) | 2.29(3) Å | K(1)-O(31)  | 2.97(4) Å   | K(7)-O(30)  | 2.76(4) Å |
|            |           |             |             | K(7)-O(35)  | 3.19(3) Å |
